# Supplementary material
Source: HighWire-hosted journal article supplement (https://bmjopen.bmj.com/content/13/8/e072021)
Supplement: inline-supplementary-material-1 [file inline-supplementary-material-1.pdf]

“PCOS 患者全胚冷冻后第一次冻胚周期内膜准备方案的比较的随机对照试验 (RCT)”  
知情同意书 版本号: 1.0 版本日期: 2021.12.01

## PCOS 患者全胚冷冻后第一次冻胚周期内膜准备方案的比较的 随机对照试验 (RCT)

### 知情同意书

亲爱的患者:

我们将邀请您参加一项 PCOS 患者全胚冷冻后第一次冻胚周期内膜准备方案的比较的随机对照试验 (RCT) 研究, 本研究为 中信湘雅生殖与遗传专科医院牵头的多中心 项目。本研究方案已经得到 \_\_\_\_\_ 伦理委员会审核, 同意进行临床研究。

在您决定是否参加这项研究之前, 请尽可能仔细阅读以下内容。它可以帮助您了解该项研究以及为何要进行这项研究, 研究的程序和期限, 参加研究后可能给您带来的益处、风险和不适。如果您愿意, 您也可以和您的亲属、朋友一起讨论, 或者请医生给予解释, 帮助您做出决定。

#### 一、研究背景和研究目的

##### 本研究目的和研究内容

此项研究是遵从赫尔辛基宣言原则, 符合医疗道德的。此项研究对符合条件的受试者在其第一个冻胚移植周期启动前进行随机分组, 以1:1的比例分配到人工周期内膜准备方案组和诱排周期内膜准备方案组, 两组分别实施相应的内膜准备方案, 并追踪第一个冻胚移植周期的助孕及围产结局, 通过比较分析, 来确证来曲唑促排卵方案相对于人工周期内膜准备方案的有效性及安全性。为临床合理选择内膜准备方案提供循证医学证据。

##### 研究参加单位、纳入患者例数及研究期限

本研究由中信湘雅生殖与遗传专科医院牵头, 在河南省人民医院、云南省第一人民医院和贵州省人民医院多家单位同时开展。本研究计划招募受试者 1078 名 (其中实验组 539 名, 对照组 539 名)。本项目的研究期限计划是从 2022 年 1 月到 2025 年 1 月, 共 36 个月; 预计您参与本研究项目的时间是 2-12 个月, 如妊娠则从进周开始随访至活产; 如未孕则从进周开始随访至移植 12 天左右。

#### 二、本研究的入选和排除标准

如果您符合以下所有入选标准且不符合任一排除标准, 则可参加该临床研究:

“PCOS 患者全胚冷冻后第一次冻胚周期内膜准备方案的比较的随机对照试验 (RCT)”  
知情同意书 版本号: 1.0 版本日期: 2021.12.01

### 入选标准:

1. 满足修正的鹿特丹标准的 PCOS 患者: 月经异常 (不规则阴道出血、稀发或闭经) 是诊断的必需条件。另外再符合下列 2 项中的 1 项: (1) 高雄激素临床表现或高雄激素血症; (2) 超声下表现为 PCOM (定义为小窦卵泡数量增加 [ $\geq 12$  个直径  $<10$  毫米的卵泡] 或  $\geq 1$  个卵巢中的卵巢体积增加 [ $>10$   $\text{cm}^3$ ]), 或两者兼而有之); 必须逐一排除其他可能引起高雄激素的疾病和引起排卵异常的疾病才能确定 PCOS 的诊断。

2. 第一次促排周期 (扳机日  $\text{Em} \geq 8\text{mm}$ );
3. 鲜胚采用拮抗剂方案和长方案 (不包含超长方案);
4. 全胚冷冻;
5. 冻胚要求: 有可移植优胚 (优胚定义: D3 胚胎, 7/8CI; 囊胚,  $\geq 4\text{BB}$  囊胚 (仅限 D5/6));
6.  $20 \text{岁} \leq \text{年龄} < 38 \text{岁}$ ;
7.  $18 \text{ kg/m}^2 \leq \text{BMI} < 30 \text{ kg/m}^2$ ;

### 排除标准:

1. RSA,
2. 单/双侧卵巢切除史者,
3. 宫腔异常: 子宫畸形 ( $\geq 1\text{cm}$  纵膈, 单角子宫, 双子宫, 重复子宫), 中-重度宫腔粘连, 内膜移位的子宫腺肌症, 未处理的粘膜下肌瘤, 压迫宫腔的子宫肌壁间肌瘤,
4. B 超下可见输卵管积水未处理,
5. 未控制的糖尿病, 未控制的甲状腺疾病, 未控制的高血压,
6. PGT 周期。

### 三、可能被分配到的研究组别以及不同研究组之间的区别

如果如果您决定参与本研究, 签署知情同意书后, 您将被随机分配到两个研究组中的其中一个: 人工周期内膜准备方案组 (HRT) 或来曲唑诱排方案组 (LE)。您被分配到两组中任何一组的概率都是相同的 (概率为 50%)。两组内膜准备的用药及治疗不同, 移植胚胎标准及后期随访内容均一样。

### 四、参加研究将需要做的事情及注意事项

“PCOS 患者全胚冷冻后第一次冻胚周期内膜准备方案的比较的随机对照试验 (RCT)”  
知情同意书 版本号: 1.0 版本日期: 2021.12.01

研究前请仔细阅读该知情同意书, 详细了解该项目, 若有疑问可咨询研究医护人员, 若在知情同意书上签字签日期。

研究开始后请遵医嘱, 按时来院进行检查和治疗, 并配合研究人员提供相关信息。

具体阶段包括:

### (1) 内膜准备

#### 来曲唑诱排方案:

月经 D3-5 开始使用来曲唑, 然后排卵监测, 必要时抽血查 E2、LH、P, 根据排卵时间确定胚胎移植时间, 具体排卵后第 3 天 (D3) 移植冷冻卵裂胚胎, 排卵后 5 天 (D5) 移植囊胚。

#### 人工周期内膜准备方案:

月经 D3-5 开始雌激素调理内膜, 内膜达标则建议黄体支持转化内膜安排胚胎移植, 具体黄体支持 (黄体支持当天定义为 P+0) 第 3 天 (P+3) 移植冷冻卵裂胚胎, 黄体支持第 5 天 (P+5) 移植囊胚。

### (2) 移植后随访

移植后 14-18 天, 移植 28-30 天, 妊娠 12-14 周, 妊娠 28-30 周, 妊娠 42 周, 研究人员会电话联系您, 收集有关妊娠及围产期并发症等必要的信息。

## 五、参加研究可能的受益

人工周期内膜准备方案的优势是胚胎移植时间具有可控性和灵活性, 但是费用较高, 且长期使用外源性雌激素可能会增加血栓等风险。现有研究发现来曲唑诱排方案具有增加 PCOS 患者 FET 周期活产率、降低流产率等优势。目前两种方案在临床均有应用, 不过目前证据强度不高, 哪种方案更优尚无明确定论。您参加该研究有可能获得直接的医疗受益, 也又能没有获益, 但是不影响常规医学诊疗流程, 不影响您的治疗治疗结局。

另外若您入选本研究, 研究周期内膜准备的相关药物将由项目组免费提供。

## 六、参加研究可能的不良反应、风险和不适及其解决措施

参与这项试验的风险并不增加常规进行辅助生殖治疗的风险。

可能部分诱排周期患者存在卵泡发育障碍等风险, 依据方案, 该类患者如内膜状态达到 8mm, 内分泌提示  $P < 1\text{ng/ml}$  则调整为人工周期药物转化内膜, 并不

“PCOS 患者全胚冷冻后第一次冻胚周期内膜准备方案的比较的随机对照试验 (RCT)”  
知情同意书 版本号: 1.0 版本日期: 2021.12.01

会增加患者周期取消率。

## 七、与研究相关的费用

参加本研究不会增加额外的检查费用, 而且研究周期的诱排药物 (来曲唑, HMG, HCG, 达芙通) 及人工周期药物 (补佳乐、安琪坦、达芙通) 免费 (周期开始 D3-5 至移植 12-14 日)。

## 八、个人信息的保密措施

您的医疗记录 (研究病历/CRF、理化检查报告等) 将完整地保存在医院, 研究者、伦理委员会和卫生监督管理部门将被允许查阅您的医疗记录。任何有关本项研究结果的公开报告将不会披露您的个人身份。我们将在法律允许的范围内, 尽一切努力保护您个人医疗资料的隐私。

## 九、获得更多信息的途径

您可以在任何时间提出有关本项研究的任何问题, 并得到相应的解答。如果在研究过程中有任何重要的新信息, 可能影响您继续参加研究的意愿时, 您的医生将会及时通知您。

您可以在工作时间就相关权益问题咨询本院伦理委员会。联系人: \_\_\_\_\_, 联系电话: \_\_\_\_\_;

您也可以在工作时间就本研究的具体内容咨询相关研究者, 联系人: \_\_\_\_\_, 联系电话: \_\_\_\_\_

## 十、可以自愿选择参加研究和中途退出研究

是否参加研究完全取决于您的意愿。您可以拒绝参加此项研究, 或在研究过程中的任何时间退出本研究, 这都不会影响您和医生间的关系, 都不会影响对您的医疗或有其他方面利益的损失。出于对您的最大利益考虑, 医生或研究者可能会在研究过程中随时中止您继续参加本项研究。

## 十一、目前需要做的事情

是否参加本项研究由您自己 (和您的家人) 决定。

在您做出参加研究的决定前, 请尽可能向您的医生询问有关问题。

感谢您阅读以上材料。如果您决定参加本项研究, 请告诉您的医生, 他/她会您安排一切有关研究的事务。请您保留这份资料。

**知情同意书. 同意签字页**
